# Supplementary material
Source: PubMed Central journal article supplement (PMC6639810)
Supplement: NIHMS1041107-supplement-Supplemental_Tables.pdf [file NIHMS1041107-supplement-Supplemental_Tables.pdf]

**Supplemental Table 1.** List of all chemicals tested in the DIO1 inhibition assay, and their relative activity rank based upon inhibition activity at 200  $\mu$ M.

| Chemical                         | CASRN       | Source <sup>a</sup> | Rank <sup>b</sup> | % Inhibition <sup>c</sup> |         |         |
|----------------------------------|-------------|---------------------|-------------------|---------------------------|---------|---------|
|                                  |             |                     |                   | median                    | minimum | maximum |
| Triclosan                        | 3380-34-5   | IS                  | 1                 | 104.0                     | 102.1   | 112.4   |
| Emamectin benzoate               | 155569-91-8 | TCp1v2              | 2                 | 100.4                     | 100.2   | 103.2   |
| Zoxamide                         | 156052-68-5 | TCp1v2              | 3                 | 93.1                      | 92.5    | 97.3    |
| Oxytetracycline dihydrate        | 6153-64-6   | TCp1v2              | 4                 | 90.8                      | 88.5    | 93.0    |
| Captafol                         | 2425-06-1   | TCp1v2              | 5                 | 89.0                      | 69.1    | 91.3    |
| Triflumizole                     | 68694-11-1  | TCp1v2              | 6                 | 88.8                      | 84.2    | 89.7    |
| Dicofol                          | 115-32-2    | TCp1v2              | 7                 | 88.0                      | 84.9    | 99.7    |
| Oryzalin                         | 19044-88-3  | IS                  | 8                 | 85.2                      | 80.5    | 96.9    |
| Oryzalin                         | 19044-88-3  | TCp1v2              | 9                 | 81.9                      | 73.7    | 84.4    |
| Fluazinam                        | 79622-59-6  | TCp1v2              | 10                | 76.3                      | 74.4    | 86.2    |
| Fenthion                         | 55-38-9     | TCp1v2              | 11                | 74.3                      | 73.8    | 79.2    |
| Cyazofamid                       | 120116-88-3 | TCp1v2              | 12                | 71.5                      | 70.4    | 75.2    |
| Chlorophene                      | 120-32-1    | IS                  | 13                | 71.4                      | 49.7    | 77.4    |
| 2-mercaptobenzothiazole          | 149-30-4    | IS                  | 14                | 69.0                      | 57.6    | 89.7    |
| Maneb                            | 12427-38-2  | TCp1v2              | 15                | 67.9                      | 58.2    | 75.6    |
| Azinphos-methyl                  | 86-50-0     | TCp1v2              | 16                | 66.2                      | 63.2    | 70.1    |
| Diclosulam                       | 145701-21-9 | TCp1v2              | 17                | 58.9                      | 47.5    | 60.2    |
| Fipronil                         | 120068-37-3 | TCp1v2              | 18                | 57.8                      | 55.7    | 60.6    |
| Butachlor                        | 23184-66-9  | TCp1v2              | 19                | 57.5                      | 52.4    | 59.2    |
| Chlorothalonil                   | 1897-45-6   | TCp1v2              | 20                | 57.3                      | 57.1    | 62.0    |
| Metolachlor                      | 51218-45-2  | TCp1v2              | 21                | 56.9                      | 49.3    | 60.2    |
| Captan                           | 133-06-2    | TCp1v2              | 22                | 54.6                      | 45.5    | 55.6    |
| Fenitrothion                     | 122-14-5    | TCp1v2              | 23                | 48.9                      | 42.0    | 56.3    |
| Alachlor                         | 15972-60-8  | TCp1v2              | 24                | 48.6                      | 45.7    | 57.5    |
| Acetochlor                       | 34256-82-1  | TCp1v2              | 25                | 48.3                      | 46.8    | 52.0    |
| Pirimiphos-methyl                | 29232-93-7  | TCp1v2              | 26                | 48.2                      | 42.3    | 50.5    |
| Malathion                        | 121-75-5    | TCp1v2              | 27                | 47.8                      | 37.9    | 53.6    |
| Flumiclorac-pentyl               | 87546-18-7  | TCp1v2              | 28                | 46.5                      | 44.0    | 51.8    |
| Niclosamide                      | 50-65-7     | TCp1v2              | 29                | 46.1                      | 40.9    | 52.4    |
| Thidiazuron                      | 51707-55-2  | TCp1v2              | 30                | 45.1                      | 38.6    | 46.0    |
| Mancozeb                         | 8018-01-7   | TCp1v2              | 31                | 45.1                      | 37.4    | 68.0    |
| Chlorophene                      | 120-32-1    | TCp1v2              | 32                | 44.8                      | 32.8    | 58.2    |
| Clodinafop-propargyl             | 105512-06-9 | TCp1v2              | 33                | 44.7                      | 43.9    | 49.5    |
| Quinoxifen                       | 124495-18-7 | TCp1v2              | 34                | 43.4                      | 38.8    | 45.4    |
| PFOS                             | 1763-23-1   | TCp1v2              | 35                | 42.7                      | 13.4    | 45.3    |
| 5-Chloro-2-mercaptobenzothiazole | 5331-91-9   | IS                  | 36                | 42.2                      | 41.9    | 62.5    |
| Prallethrin                      | 23031-36-9  | TCp1v2              | 37                | 38.7                      | 31.5    | 55.4    |
| Mesotrione                       | 104206-82-8 | TCp1v2              | 38                | 38.4                      | 34.9    | 40.1    |

## Hornung et al.\_DIO1 Inhibition Screening

| Chemical                                                     | CASRN       | Source <sup>a</sup> | Rank <sup>b</sup> | % Inhibition <sup>c</sup> |         |         |
|--------------------------------------------------------------|-------------|---------------------|-------------------|---------------------------|---------|---------|
|                                                              |             |                     |                   | median                    | minimum | maximum |
| 2,2-Bis(4-hydroxyphenyl)-1,1,1-trichloroethane               | 2971-36-0   | TCp1v2              | 39                | 38.4                      | 38.2    | 54.1    |
| Azamethiphos                                                 | 35575-96-3  | TCp1v2              | 40                | 37.7                      | 36.0    | 40.6    |
| Acibenzolar-S-methyl                                         | 135158-54-2 | TCp1v2              | 41                | 36.5                      | 34.2    | 41.0    |
| Pirimicarb                                                   | 23103-98-2  | TCp1v2              | 42                | 33.9                      | 31.8    | 51.3    |
| Rotenone                                                     | 83-79-4     | TCp1v2              | 43                | 33.1                      | 29.7    | 34.5    |
| Methidathion                                                 | 950-37-8    | TCp1v2              | 44                | 32.3                      | 22.1    | 63.8    |
| Folpet                                                       | 133-07-3    | TCp1v2              | 45                | 32.3                      | 23.6    | 37.6    |
| Thiophanate-methyl                                           | 23564-05-8  | TCp1v2              | 46                | 32.0                      | 31.9    | 42.7    |
| Chlorpyrifos-methyl                                          | 5598-13-0   | TCp1v2              | 47                | 30.6                      | 15.4    | 31.7    |
| Propargite                                                   | 2312-35-8   | TCp1v2              | 48                | 29.2                      | 26.0    | 30.6    |
| Milbemectin (mixture of 70% Milbemcin A4, 30% Milbemycin A3) | No CAS      | TCp1v2              | 49                | 28.6                      | 24.1    | 29.7    |
| Resmethrin                                                   | 10453-86-8  | TCp1v2              | 50                | 26.2                      | 26.1    | 27.0    |
| Anilazine                                                    | 101-05-3    | TCp1v2              | 51                | 24.8                      | 23.4    | 38.7    |
| Amitraz                                                      | 33089-61-1  | TCp1v2              | 52                | 24.4                      | 16.5    | 27.2    |
| Methyl parathion                                             | 298-00-0    | TCp1v2              | 53                | 20.8                      | 10.9    | 45.2    |
| Tetramethrin                                                 | 7696-12-0   | TCp1v2              | 54                | 19.3                      | 18.4    | 20.0    |
| Acifluorfen                                                  | 50594-66-6  | TCp1v2              | 55                | 17.0                      | -0.2    | 18.0    |
| Chlorethoxyfos                                               | 54593-83-8  | TCp1v2              | 56                | 16.7                      | 8.7     | 21.3    |
| Isoxaflutole                                                 | 141112-29-0 | TCp1v2              | 57                | 14.6                      | -6.4    | 15.4    |
| Forchlorfenuron                                              | 68157-60-8  | TCp1v2              | 58                | 14.5                      | 10.4    | 19.1    |
| Bromoxynil                                                   | 1689-84-5   | TCp1v2              | 59                | 14.5                      | 12.5    | 27.5    |
| Dimethenamid                                                 | 87674-68-8  | TCp1v2              | 60                | 12.7                      | 12.0    | 12.8    |
| Diazinon                                                     | 333-41-5    | TCp1v2              | 61                | 12.1                      | 0.9     | 38.2    |
| Clopyralid                                                   | 1702-17-6   | TCp1v2              | 62                | 11.4                      | -9.2    | 12.5    |
| Symclosene                                                   | 87-90-1     | TCp1v2              | 63                | 10.7                      | 7.1     | 10.8    |
| Spiroxamine                                                  | 118134-30-8 | TCp1v2              | 64                | 10.6                      | 6.6     | 11.8    |
| Prodiamine                                                   | 29091-21-2  | TCp1v2              | 65                | 10.6                      | -5.2    | 11.0    |
| Chlorpyrifos oxon                                            | 5598-15-2   | TCp1v2              | 66                | 9.8                       | 8.4     | 16.7    |
| Imazamox                                                     | 114311-32-9 | TCp1v2              | 67                | 9.3                       | -1.9    | 12.3    |
| Flumioxazin                                                  | 103361-09-7 | TCp1v2              | 68                | 9.2                       | 4.0     | 27.8    |
| Fluoxastrobin                                                | 361377-29-9 | TCp1v2              | 69                | 9.0                       | -6.2    | 12.7    |
| Etoazole                                                     | 153233-91-1 | TCp1v2              | 70                | 8.9                       | 2.3     | 13.9    |
| Fenamiphos                                                   | 22224-92-6  | TCp1v2              | 71                | 8.5                       | 1.9     | 11.4    |
| Endosulfan                                                   | 115-29-7    | TCp1v2              | 72                | 8.1                       | 1.7     | 13.4    |
| Oxamyl                                                       | 23135-22-0  | TCp1v2              | 73                | 8.1                       | -16.9   | 8.8     |
| Tepraloxymid                                                 | 149979-41-9 | TCp1v2              | 74                | 7.6                       | -8.9    | 12.1    |
| Thiacloprid                                                  | 111988-49-9 | TCp1v2              | 75                | 7.2                       | -10.0   | 7.4     |
| Trifloxystrobin                                              | 141517-21-7 | TCp1v2              | 76                | 7.1                       | -5.9    | 7.8     |
| Iodosulfuron-methyl-sodium                                   | 144550-36-7 | TCp1v2              | 77                | 6.7                       | -7.9    | 10.5    |
| Cyclanilide                                                  | 113136-77-9 | TCp1v2              | 78                | 6.7                       | -1.2    | 12.3    |

| Chemical                              | CASRN       | Source <sup>a</sup> | Rank <sup>b</sup> | % Inhibition <sup>c</sup> |         |         |
|---------------------------------------|-------------|---------------------|-------------------|---------------------------|---------|---------|
|                                       |             |                     |                   | median                    | minimum | maximum |
| Ethephon                              | 16672-87-0  | TCp1v2              | 79                | 6.7                       | 1.8     | 7.4     |
| 2,4-DB                                | 94-82-6     | TCp1v2              | 80                | 6.5                       | -10.9   | 12.4    |
| Imazapic                              | 104098-48-8 | TCp1v2              | 81                | 6.4                       | -15.9   | 11.4    |
| Tebufenozide                          | 112410-23-8 | TCp1v2              | 82                | 6.3                       | -3.6    | 7.3     |
| Isazofos                              | 42509-80-8  | TCp1v2              | 83                | 6.3                       | 0.4     | 8.8     |
| Mevinphos                             | 7786-34-7   | TCp1v2              | 84                | 6.3                       | 2.7     | 10.5    |
| Oxyfluorfen                           | 42874-03-3  | TCp1v2              | 85                | 6.2                       | 2.5     | 6.3     |
| Dimethomorph                          | 110488-70-5 | TCp1v2              | 86                | 6.2                       | -18.5   | 10.7    |
| Novaluron                             | 116714-46-6 | TCp1v2              | 87                | 6.0                       | -13.6   | 8.5     |
| Atrazine                              | 1912-24-9   | TCp1v2              | 88                | 5.8                       | -6.1    | 8.6     |
| Penoxsulam                            | 219714-96-2 | TCp1v2              | 89                | 5.8                       | -1.8    | 9.2     |
| Ethofumesate                          | 26225-79-6  | TCp1v2              | 90                | 5.7                       | 5.3     | 11.8    |
| S-Bioallethrin                        | 28434-00-6  | TCp1v2              | 91                | 5.7                       | 3.1     | 6.4     |
| Deisopropylatrazine                   | 1007-28-9   | TCp1v2              | 92                | 5.7                       | -8.5    | 8.7     |
| Fluroxypyr-meptyl                     | 81406-37-3  | TCp1v2              | 93                | 5.7                       | -8.4    | 7.7     |
| Icaridin                              | 119515-38-7 | TCp1v2              | 94                | 5.7                       | -9.7    | 8.8     |
| Malaoxon                              | 1634-78-2   | TCp1v2              | 95                | 5.6                       | 1.5     | 19.2    |
| Flufenacet                            | 142459-58-3 | TCp1v2              | 96                | 5.4                       | 0.6     | 6.2     |
| Pyriithiobac-sodium                   | 123343-16-8 | TCp1v2              | 97                | 5.3                       | -4.5    | 6.7     |
| Famoxadone                            | 131807-57-3 | TCp1v2              | 98                | 5.2                       | 0.1     | 5.9     |
| Fluroxypyr                            | 69377-81-7  | TCp1v2              | 99                | 5.1                       | 0.8     | 5.4     |
| Fluazifop-butyl                       | 69806-50-4  | TCp1v2              | 100               | 5.0                       | 2.5     | 7.0     |
| Propetamphos                          | 31218-83-4  | TCp1v2              | 101               | 4.7                       | 3.7     | 5.6     |
| Fenamidone                            | 161326-34-7 | TCp1v2              | 102               | 4.7                       | -4.0    | 6.1     |
| Tetraconazole                         | 112281-77-3 | TCp1v2              | 103               | 4.5                       | -9.0    | 7.6     |
| Dichlorprop                           | 120-36-5    | TCp1v2              | 104               | 4.5                       | -1.9    | 14.3    |
| 2-(Thiocyanomethylthio)-benzothiazole | 21564-17-0  | TCp1v2              | 105               | 4.4                       | 0.5     | 7.7     |
| Cypermethrin                          | 52315-07-8  | TCp1v2              | 106               | 4.3                       | -1.8    | 6.4     |
| Propazine                             | 139-40-2    | TCp1v2              | 107               | 4.2                       | -4.2    | 4.5     |
| Cyanamide                             | 420-04-2    | TCp1v2              | 108               | 4.1                       | -1.0    | 4.1     |
| Ethylene thiourea                     | 96-45-7     | TCp1v2              | 109               | 4.0                       | -2.3    | 4.0     |
| Hexaconazole                          | 79983-71-4  | TCp1v2              | 110               | 3.8                       | 2.5     | 7.8     |
| Pyraclostrobin                        | 175013-18-0 | TCp1v2              | 111               | 3.8                       | -2.3    | 12.7    |
| Tebupirimfos                          | 96182-53-5  | TCp1v2              | 112               | 3.7                       | -2.6    | 20.0    |
| Abamectin                             | 71751-41-2  | TCp1v2              | 113               | 3.6                       | -1.8    | 6.7     |
| Napropamide                           | 15299-99-7  | TCp1v2              | 114               | 3.5                       | 2.6     | 4.9     |
| Cycloate                              | 1134-23-2   | TCp1v2              | 115               | 3.5                       | 1.9     | 4.6     |
| Naled                                 | 300-76-5    | TCp1v2              | 116               | 3.5                       | -4.0    | 4.3     |
| Dicloran                              | 99-30-9     | TCp1v2              | 117               | 3.5                       | -0.9    | 6.4     |
| Flufenpyr-ethyl                       | 188489-07-8 | TCp1v2              | 118               | 3.5                       | 3.4     | 6.2     |
| Chloridazon                           | 1698-60-8   | TCp1v2              | 119               | 3.4                       | -5.3    | 7.2     |

| Chemical                    | CASRN       | Source <sup>a</sup> | Rank <sup>b</sup> | % Inhibition <sup>c</sup> |         |         |
|-----------------------------|-------------|---------------------|-------------------|---------------------------|---------|---------|
|                             |             |                     |                   | median                    | minimum | maximum |
| Carboxin                    | 5234-68-4   | TCp1v2              | 120               | 3.3                       | -3.9    | 9.4     |
| Fenoxaprop-ethyl            | 66441-23-4  | TCp1v2              | 121               | 3.2                       | 1.9     | 3.3     |
| Bensulide                   | 741-58-2    | TCp1v2              | 122               | 3.0                       | 0.9     | 3.7     |
| Thiodicarb                  | 59669-26-0  | TCp1v2              | 123               | 3.0                       | -2.0    | 16.2    |
| Thiram                      | 137-26-8    | TCp1v2              | 124               | 3.0                       | 2.4     | 3.2     |
| Bendiocarb                  | 22781-23-3  | TCp1v2              | 125               | 2.9                       | -1.4    | 5.9     |
| Lindane                     | 58-89-9     | TCp1v2              | 126               | 2.8                       | 0.2     | 3.2     |
| Prochloraz                  | 67747-09-5  | TCp1v2              | 127               | 2.8                       | 0.1     | 4.1     |
| Buprofezin                  | 69327-76-0  | TCp1v2              | 128               | 2.7                       | -1.1    | 2.7     |
| Lactofen                    | 77501-63-4  | TCp1v2              | 129               | 2.7                       | -0.7    | 3.3     |
| Dicamba                     | 1918-00-9   | TCp1v2              | 130               | 2.5                       | -1.8    | 5.2     |
| Terbacil                    | 5902-51-2   | TCp1v2              | 131               | 2.5                       | -3.1    | 4.9     |
| Triadimefon                 | 43121-43-3  | TCp1v2              | 132               | 2.4                       | 0.4     | 5.4     |
| Quizalofop-ethyl            | 76578-14-8  | TCp1v2              | 133               | 2.4                       | -0.5    | 12.7    |
| Phosalone                   | 2310-17-0   | TCp1v2              | 134               | 2.4                       | 2.4     | 8.3     |
| 2-(Methylthio)benzothiazole | 615-22-5    | IS                  | 135               | 2.3                       | -5.3    | 3.0     |
| Imidacloprid                | 138261-41-3 | TCp1v2              | 136               | 2.3                       | 2.1     | 6.4     |
| Butylate                    | 2008-41-5   | TCp1v2              | 137               | 2.2                       | -1.6    | 5.3     |
| Methoxyfenozide             | 161050-58-4 | TCp1v2              | 138               | 2.2                       | -7.0    | 3.0     |
| Benzothiazole               | 95-16-9     | IS                  | 139               | 2.2                       | -3.9    | 5.1     |
| Cyhalofop-butyl             | 122008-85-9 | TCp1v2              | 140               | 2.1                       | -2.0    | 2.4     |
| Cyromazine                  | 66215-27-8  | TCp1v2              | 141               | 2.1                       | -2.4    | 4.3     |
| Acephate                    | 30560-19-1  | TCp1v2              | 142               | 1.9                       | -1.5    | 3.3     |
| Imazapyr                    | 81334-34-1  | TCp1v2              | 143               | 1.8                       | -4.9    | 7.7     |
| Imazaquin                   | 81335-37-7  | TCp1v2              | 144               | 1.8                       | 1.3     | 5.9     |
| Paclobutrazol               | 76738-62-0  | TCp1v2              | 145               | 1.8                       | 0.4     | 21.0    |
| Bentazone                   | 25057-89-0  | TCp1v2              | 146               | 1.7                       | 0.5     | 11.4    |
| Boscalid                    | 188425-85-6 | TCp1v2              | 147               | 1.7                       | -0.9    | 3.7     |
| Butafenacil                 | 134605-64-4 | TCp1v2              | 148               | 1.7                       | 1.6     | 5.4     |
| Sethoxydim                  | 74051-80-2  | TCp1v2              | 149               | 1.5                       | -2.4    | 4.0     |
| Cloprop                     | 101-10-0    | TCp1v2              | 150               | 1.4                       | 0.7     | 3.7     |
| Esfenvalerate               | 66230-04-4  | TCp1v2              | 151               | 1.4                       | -5.8    | 4.7     |
| Asulam                      | 3337-71-1   | TCp1v2              | 152               | 1.4                       | 0.8     | 6.0     |
| Ethalfuralin                | 55283-68-6  | TCp1v2              | 153               | 1.3                       | -2.9    | 6.8     |
| Clopyralid-olamine          | 57754-85-5  | TCp1v2              | 154               | 1.3                       | -0.8    | 4.0     |
| Dazomet                     | 533-74-4    | TCp1v2              | 155               | 1.3                       | -1.5    | 1.9     |
| Fenarimol                   | 60168-88-9  | TCp1v2              | 156               | 1.3                       | 1.2     | 3.7     |
| Flutolanil                  | 66332-96-5  | TCp1v2              | 157               | 1.3                       | -5.4    | 3.9     |
| Fluometuron                 | 2164-17-2   | TCp1v2              | 158               | 1.2                       | -4.7    | 2.0     |
| Cyanazine                   | 21725-46-2  | TCp1v2              | 159               | 1.2                       | -6.3    | 13.2    |
| Maleic hydrazide            | 123-33-1    | TCp1v2              | 160               | 1.2                       | -1.5    | 1.7     |
| Clomazone                   | 81777-89-1  | TCp1v2              | 161               | 1.2                       | -5.4    | 4.5     |

| Chemical                     | CASRN       | Source <sup>a</sup> | Rank <sup>b</sup> | % Inhibition <sup>c</sup> |         |         |
|------------------------------|-------------|---------------------|-------------------|---------------------------|---------|---------|
|                              |             |                     |                   | median                    | minimum | maximum |
| Trichlorfon                  | 52-68-6     | TCp1v2              | 162               | 1.1                       | -2.1    | 1.4     |
| Dimethoate                   | 60-51-5     | TCp1v2              | 163               | 1.0                       | 0.8     | 29.8    |
| Chloroneb                    | 2675-77-6   | TCp1v2              | 164               | 0.9                       | 0.5     | 2.1     |
| Pymetrozine                  | 123312-89-0 | TCp1v2              | 165               | 0.9                       | -1.5    | 6.4     |
| Prometon                     | 1610-18-0   | TCp1v2              | 166               | 0.9                       | -5.1    | 1.4     |
| Clothianidin                 | 210880-92-5 | TCp1v2              | 167               | 0.8                       | -1.5    | 2.3     |
| Dibutyl phthalate            | 84-74-2     | TCp1v2              | 168               | 0.8                       | -16.7   | 13.8    |
| Formetanate hydrochloride    | 23422-53-9  | TCp1v2              | 169               | 0.8                       | -4.3    | 1.6     |
| Isoxaben                     | 82558-50-7  | TCp1v2              | 170               | 0.8                       | -3.1    | 4.3     |
| Cinmethylin                  | 87818-31-3  | TCp1v2              | 171               | 0.8                       | 0.6     | 1.1     |
| Ametryn                      | 834-12-8    | TCp1v2              | 172               | 0.7                       | -3.0    | 1.3     |
| Diclotophos                  | 141-66-2    | TCp1v2              | 173               | 0.7                       | -1.5    | 4.3     |
| Imazalil                     | 35554-44-0  | TCp1v2              | 174               | 0.6                       | -8.4    | 3.7     |
| Tri-allate                   | 2303-17-5   | TCp1v2              | 175               | 0.6                       | 0.3     | 2.9     |
| Fludioxonil                  | 131341-86-1 | TCp1v2              | 176               | 0.5                       | -2.2    | 3.2     |
| Propanil                     | 709-98-8    | TCp1v2              | 177               | 0.5                       | -0.5    | 3.2     |
| Monocrotophos                | 6923-22-4   | TCp1v2              | 178               | 0.5                       | -5.0    | 3.4     |
| Carfentrazone-ethyl          | 128639-02-1 | TCp1v2              | 179               | 0.4                       | -5.3    | 17.3    |
| Fenoxycarb                   | 72490-01-8  | TCp1v2              | 180               | 0.4                       | -0.7    | 3.7     |
| PFOA                         | 335-67-1    | TCp1v2              | 181               | 0.4                       | -5.2    | 0.8     |
| 2-Methoxyethanol             | 109-86-4    | TCp1v2              | 182               | 0.4                       | -1.8    | 2.5     |
| MGK-264                      | 113-48-4    | TCp1v2              | 183               | 0.3                       | -10.7   | 13.4    |
| Diphenylamine                | 122-39-4    | TCp1v2              | 184               | 0.3                       | -2.5    | 2.3     |
| Methamidophos                | 10265-92-6  | TCp1v2              | 185               | 0.1                       | -2.1    | 5.7     |
| Bifenthrin                   | 82657-04-3  | TCp1v2              | 186               | 0.1                       | -4.5    | 0.6     |
| Tebuthiuron                  | 34014-18-1  | TCp1v2              | 187               | 0.1                       | -4.0    | 1.0     |
| Diquat dibromide monohydrate | 6385-62-2   | TCp1v2              | 188               | 0.1                       | -0.8    | 1.0     |
| Cymoxanil                    | 57966-95-7  | TCp1v2              | 189               | 0.0                       | -0.1    | 0.4     |
| Iprodione                    | 36734-19-7  | TCp1v2              | 190               | -0.1                      | -4.4    | 2.7     |
| Myclobutanil                 | 88671-89-0  | TCp1v2              | 191               | -0.1                      | -1.2    | 2.5     |
| Benomyl                      | 17804-35-2  | TCp1v2              | 192               | -0.1                      | -1.6    | 1.4     |
| Bromacil                     | 314-40-9    | TCp1v2              | 193               | -0.2                      | -5.2    | 0.2     |
| Thiabendazole                | 148-79-8    | TCp1v2              | 194               | -0.2                      | -0.3    | 3.7     |
| Simazine                     | 122-34-9    | TCp1v2              | 195               | -0.2                      | -1.2    | 1.6     |
| Difenzoquat metilsulfate     | 43222-48-6  | TCp1v2              | 196               | -0.2                      | -1.5    | 4.9     |
| Dithiopyr                    | 97886-45-8  | TCp1v2              | 197               | -0.2                      | -1.6    | 11.8    |
| Diniconazole                 | 83657-24-3  | TCp1v2              | 198               | -0.3                      | -2.7    | 1.9     |
| Butralin                     | 33629-47-9  | TCp1v2              | 199               | -0.3                      | -5.8    | 2.2     |
| Vinclozolin                  | 50471-44-8  | TCp1v2              | 200               | -0.3                      | -3.3    | 0.5     |
| Carbaryl                     | 63-25-2     | TCp1v2              | 201               | -0.4                      | -4.2    | 3.3     |
| Quinclorac                   | 84087-01-4  | TCp1v2              | 202               | -0.5                      | -2.8    | 5.1     |

| Chemical                       | CASRN       | Source <sup>a</sup> | Rank <sup>b</sup> | % Inhibition <sup>c</sup> |         |         |
|--------------------------------|-------------|---------------------|-------------------|---------------------------|---------|---------|
|                                |             |                     |                   | median                    | minimum | maximum |
| Prometryn                      | 7287-19-6   | TCp1v2              | 203               | -0.5                      | -2.9    | 10.5    |
| Hexythiazox                    | 78587-05-0  | TCp1v2              | 204               | -0.5                      | -2.9    | 3.1     |
| Benfluralin                    | 1861-40-1   | TCp1v2              | 205               | -0.5                      | -1.0    | 1.4     |
| Bisphenol A                    | 80-05-7     | TCp1v2              | 206               | -0.5                      | -6.6    | 8.7     |
| Trifloxysulfuron-sodium        | 199119-58-9 | TCp1v2              | 207               | -0.6                      | -5.8    | 8.0     |
| Thiazopyr                      | 117718-60-2 | TCp1v2              | 208               | -0.6                      | -2.9    | 5.0     |
| Pentachloronitrobenzene        | 82-68-8     | TCp1v2              | 209               | -0.7                      | -2.4    | 3.0     |
| 2,4-Dichlorophenoxyacetic acid | 94-75-7     | TCp1v2              | 210               | -0.7                      | -11.0   | 2.4     |
| Parathion                      | 56-38-2     | TCp1v2              | 211               | -0.7                      | -2.4    | 4.0     |
| Metribuzin                     | 21087-64-9  | TCp1v2              | 212               | -0.7                      | -5.5    | 0.0     |
| Triadimenol                    | 55219-65-3  | TCp1v2              | 213               | -0.7                      | -4.3    | 7.2     |
| Aldicarb                       | 116-06-3    | TCp1v2              | 214               | -0.8                      | -12.8   | 3.0     |
| DEET                           | 134-62-3    | TCp1v2              | 215               | -0.8                      | -1.8    | 4.3     |
| Propyzamide                    | 23950-58-5  | TCp1v2              | 216               | -0.8                      | -6.8    | 1.4     |
| Disulfoton                     | 298-04-4    | TCp1v2              | 217               | -0.9                      | -7.7    | -0.2    |
| Coumaphos                      | 56-72-4     | TCp1v2              | 218               | -0.9                      | -1.5    | 16.6    |
| Triticonazole                  | 131983-72-7 | TCp1v2              | 219               | -1.0                      | -2.9    | 6.7     |
| Triphenyltin hydroxide         | 76-87-9     | TCp1v2              | 220               | -1.0                      | -4.5    | 0.7     |
| Methyl isothiocyanate          | 556-61-6    | TCp1v2              | 221               | -1.0                      | -5.2    | 5.1     |
| Tribufos                       | 78-48-8     | TCp1v2              | 222               | -1.0                      | -2.3    | 1.5     |
| Cyfluthrin                     | 68359-37-5  | TCp1v2              | 223               | -1.0                      | -8.1    | 5.1     |
| Dimethyl phthalate             | 131-11-3    | TCp1v2              | 224               | -1.0                      | -2.9    | 4.2     |
| Picloram                       | 1918-02-1   | TCp1v2              | 225               | -1.0                      | -2.9    | 1.9     |
| Tebufenpyrad                   | 119168-77-3 | TCp1v2              | 226               | -1.0                      | -2.0    | 5.1     |
| Flusilazole                    | 85509-19-9  | TCp1v2              | 227               | -1.1                      | -2.3    | 2.5     |
| Di(2-ethylhexyl) phthalate     | 117-81-7    | TCp1v2              | 228               | -1.2                      | -1.9    | 0.3     |
| Imazethapyr                    | 81335-77-5  | TCp1v2              | 229               | -1.3                      | -5.2    | 3.3     |
| Acetamiprid                    | 135410-20-7 | TCp1v2              | 230               | -1.4                      | -3.4    | 6.7     |
| Diclofop-methyl                | 51338-27-3  | TCp1v2              | 231               | -1.5                      | -2.8    | 12.2    |
| Flumetsulam                    | 98967-40-9  | TCp1v2              | 232               | -1.5                      | -3.4    | 14.4    |
| Dichlobenil                    | 1194-65-6   | TCp1v2              | 233               | -1.6                      | -3.9    | 2.7     |
| 2-Phenoxyethanol               | 122-99-6    | TCp1v2              | 234               | -1.6                      | -2.3    | 1.9     |
| Permethrin                     | 52645-53-1  | TCp1v2              | 235               | -1.6                      | -2.1    | 18.9    |
| Linuron                        | 330-55-2    | TCp1v2              | 236               | -1.6                      | -4.3    | 6.9     |
| Spirodiclofen                  | 148477-71-8 | TCp1v2              | 237               | -1.7                      | -2.1    | 9.6     |
| Norflurazon                    | 27314-13-2  | TCp1v2              | 238               | -1.8                      | -2.7    | 5.8     |
| Pendimethalin                  | 40487-42-1  | TCp1v2              | 239               | -1.8                      | -2.7    | 0.7     |
| Thiobencarb                    | 28249-77-6  | TCp1v2              | 240               | -1.8                      | -3.1    | 0.1     |
| Indoxacarb                     | 173584-44-6 | TCp1v2              | 241               | -1.8                      | -2.8    | 2.9     |
| Molinate                       | 2212-67-1   | TCp1v2              | 242               | -1.9                      | -3.9    | 7.9     |
| Tralkoxydim                    | 87820-88-0  | TCp1v2              | 243               | -1.9                      | -8.4    | 5.0     |

| Chemical               | CASRN       | Source <sup>a</sup> | Rank <sup>b</sup> | % Inhibition <sup>c</sup> |         |         |
|------------------------|-------------|---------------------|-------------------|---------------------------|---------|---------|
|                        |             |                     |                   | median                    | minimum | maximum |
| Dimethylarsinic acid   | 75-60-5     | TCp1v2              | 244               | -1.9                      | -8.0    | 3.0     |
| Diuron                 | 330-54-1    | TCp1v2              | 245               | -1.9                      | -4.2    | 1.1     |
| Methomyl               | 16752-77-5  | TCp1v2              | 246               | -1.9                      | -7.1    | -1.0    |
| Cyprodinil             | 121552-61-2 | TCp1v2              | 247               | -1.9                      | -2.0    | -1.5    |
| Piperonyl butoxide     | 51-03-6     | TCp1v2              | 248               | -2.0                      | -5.0    | 6.4     |
| Propoxur               | 114-26-1    | TCp1v2              | 249               | -2.0                      | -2.3    | 2.0     |
| MEHP                   | 4376-20-9   | TCp1v2              | 250               | -2.1                      | -2.8    | 2.4     |
| Azoxystrobin           | 131860-33-8 | TCp1v2              | 251               | -2.1                      | -15.4   | 10.2    |
| Difenoconazole         | 119446-68-3 | TCp1v2              | 252               | -2.3                      | -4.3    | 1.6     |
| MCPA                   | 94-74-6     | TCp1v2              | 253               | -2.4                      | -6.6    | 0.4     |
| Trifluralin            | 1582-09-8   | TCp1v2              | 254               | -2.5                      | -2.9    | 0.5     |
| Fluthiacet-methyl      | 117337-19-6 | TCp1v2              | 255               | -2.5                      | -5.6    | 11.4    |
| Clofentezine           | 74115-24-5  | TCp1v2              | 256               | -2.5                      | -3.8    | 0.9     |
| Methoxychlor           | 72-43-5     | TCp1v2              | 257               | -2.6                      | -4.5    | 6.6     |
| Propiconazole          | 60207-90-1  | TCp1v2              | 258               | -2.7                      | -6.1    | 3.1     |
| Mepiquat chloride      | 24307-26-4  | TCp1v2              | 259               | -2.7                      | -3.1    | 5.7     |
| Fenpropathrin          | 39515-41-8  | TCp1v2              | 260               | -2.8                      | -3.9    | 1.6     |
| Pyriproxyfen           | 95737-68-1  | TCp1v2              | 261               | -2.8                      | -4.9    | 7.3     |
| 2-Aminobenzothiazole   | 136-95-8    | IS                  | 262               | -3.0                      | -4.9    | 5.4     |
| Chlorpropham           | 101-21-3    | TCp1v2              | 263               | -3.0                      | -3.3    | 6.3     |
| Profenofos             | 41198-08-7  | TCp1v2              | 264               | -3.1                      | -3.7    | 3.2     |
| Iopanoic acid          | 96-83-3     | IS                  | 265               | -3.2                      | -3.7    | 6.7     |
| Boric acid             | 10043-35-3  | TCp1v2              | 266               | -3.2                      | -6.3    | 4.6     |
| Metalaxyl              | 57837-19-1  | TCp1v2              | 267               | -3.2                      | -6.8    | 4.0     |
| Monobutyl phthalate    | 131-70-4    | TCp1v2              | 268               | -3.6                      | -7.4    | 1.7     |
| EPTC                   | 759-94-4    | TCp1v2              | 269               | -3.7                      | -4.0    | 2.8     |
| Sulfentrazone          | 122836-35-5 | TCp1v2              | 270               | -3.9                      | -4.8    | 13.6    |
| Nitrapyrin             | 1929-82-4   | TCp1v2              | 271               | -4.0                      | -4.0    | 3.0     |
| 2-Hydroxybenzothiazole | 934-34-9    | IS                  | 272               | -4.0                      | -13.1   | 2.9     |
| Diazoxon               | 962-58-3    | TCp1v2              | 273               | -4.2                      | -7.4    | 3.1     |
| Metam-sodium hydrate   | 6734-80-1   | TCp1v2              | 274               | -4.2                      | -4.8    | 2.7     |
| Dichlorvos             | 62-73-7     | TCp1v2              | 275               | -4.3                      | -5.0    | 3.5     |
| Allethrin              | 584-79-2    | TCp1v2              | 276               | -4.6                      | -6.2    | 10.6    |
| Monomethyl phthalate   | 4376-18-5   | TCp1v2              | 277               | -4.8                      | -7.5    | 1.2     |
| Pyraflufen-ethyl       | 129630-19-9 | TCp1v2              | 278               | -4.8                      | -34.2   | 4.7     |
| Cyproconazole          | 94361-06-5  | TCp1v2              | 279               | -4.9                      | -6.7    | 18.1    |
| Fluazifop-P-butyl      | 79241-46-6  | TCp1v2              | 280               | -5.1                      | -10.6   | 4.7     |
| Ethoprop               | 13194-48-4  | TCp1v2              | 281               | -5.3                      | -8.9    | 5.1     |
| Daminozide             | 1596-84-5   | TCp1v2              | 282               | -5.4                      | -6.0    | -4.7    |
| Hexazinone             | 51235-04-2  | TCp1v2              | 283               | -5.4                      | -8.8    | 3.0     |
| Oxadiazon              | 19666-30-9  | TCp1v2              | 284               | -5.4                      | -6.3    | 3.6     |
| Etridiazole            | 2593-15-9   | TCp1v2              | 285               | -5.4                      | -5.8    | 15.0    |

| Chemical                           | CASRN       | Source <sup>a</sup> | Rank <sup>b</sup> | % Inhibition <sup>c</sup> |         |         |
|------------------------------------|-------------|---------------------|-------------------|---------------------------|---------|---------|
|                                    |             |                     |                   | median                    | minimum | maximum |
| Tefluthrin                         | 79538-32-2  | TCp1v2              | 286               | -5.8                      | -13.2   | 10.8    |
| 2-Phenylphenol                     | 90-43-7     | TCp1v2              | 287               | -6.8                      | -8.5    | 3.0     |
| Fenbuconazole                      | 114369-43-6 | TCp1v2              | 288               | -6.8                      | -9.4    | -4.1    |
| Fenpyroximate (Z,E)                | 111812-58-9 | TCp1v2              | 289               | -6.9                      | -11.3   | 11.6    |
| Fosthiazate                        | 98886-44-3  | TCp1v2              | 290               | -8.1                      | -16.8   | 11.1    |
| Propoxycarbazone-sodium            | 181274-15-7 | TCp1v2              | 291               | -8.3                      | -10.2   | 8.0     |
| Thiamethoxam                       | 153719-23-4 | TCp1v2              | 292               | -8.4                      | -10.0   | 4.2     |
| Propamocarb hydrochloride          | 25606-41-1  | TCp1v2              | 293               | -8.5                      | -14.2   | 6.5     |
| Dipropyl 2,5-pyridinedicarboxylate | 136-45-8    | TCp1v2              | 294               | -8.6                      | -15.8   | 11.7    |
| Flumetralin                        | 62924-70-3  | TCp1v2              | 295               | -8.6                      | -10.7   | 11.1    |
| Pyridaben                          | 96489-71-3  | TCp1v2              | 296               | -9.1                      | -12.3   | 9.3     |
| Bifenazate                         | 149877-41-8 | TCp1v2              | 297               | -9.6                      | -13.2   | 13.6    |
| Triclopyr                          | 55335-06-3  | TCp1v2              | 298               | -9.7                      | -13.5   | 8.5     |
| Pyrimethanil                       | 53112-28-0  | TCp1v2              | 299               | -11.2                     | -13.4   | 6.9     |
| Fenhexamid                         | 126833-17-8 | TCp1v2              | 300               | -13.6                     | -19.2   | -5.4    |

- Source. IS indicates chemicals used for the initial screening assay development from stocks on hand at EPA/ORD/NHEERL/MED in Duluth. TCp1v2 indicates ToxCast p1\_v2 chemical library obtained via Dr. Ann Richard, EPA/ORD/NCCT, Research Triangle Park, NC, USA.
- Rank. The chemical rank compared to the others in this set of test chemicals for inhibition efficacy when tested at 200  $\mu$ M. A rank of 1 indicates the chemical that inhibited the DIO1 activity the greatest in the single concentration screen.
- % inhibition of the data from the three replicate runs of each chemical. Values for the n=3 data points are shown and sorted by median, minimum and maximum inhibition response.



**Supplemental Table 2.** Chemical samples that were identified as interfering with the assay and therefore were not assigned a rank, and those tested in initial screening at 1mM that produced no activity so could not be ranked based on 200  $\mu$ M test concentration.

| <b>Chemical</b>                    | <b>CASRN</b> | <b>Source<sup>a</sup></b> | <b>Note</b>      |
|------------------------------------|--------------|---------------------------|------------------|
| 3-Iodo-2-propynyl-N-butylcarbamate | 55406-53-6   | TCp1v2                    | INT <sup>b</sup> |
| Methylene bis(thiocyanate)         | 6317-18-6    | TCp1v2                    | INT              |
| <i>t</i> -Butylhydroquinone        | 1948-33-0    | IS                        | 1mM <sup>c</sup> |
| Bisphenol A                        | 80-05-7      | IS                        | 1mM              |
| Benzotriazole                      | 95-14-7      | IS                        | 1mM              |
| Dibutylphthalate                   | 84-74-2      | IS                        | 1mM              |
| Methimazole                        | 60-56-0      | IS                        | 1mM              |
| 4-pentylaniline                    | 33228-44-3   | IS                        | 1mM              |
| 2,2',4,4'-Tetrabromo-diphenylether | 5436-43-1    | IS                        | 1mM              |
| 4-Bromophenol                      | 106-41-2     | IS                        | 1mM              |

- a. Source. IS indicates chemicals used for the initial screening assay development from stocks on hand at EPA/ORD/NHEERL/MED in Duluth. TCp1v2 indicates ToxCast p1\_v2 chemical library obtained via Dr. Ann Richard, EPA/ORD/NCCT, Research Triangle Park, NC, USA.
- b. INT. Chemicals that were determined to interfere with the SK reaction, therefore, their activity could not be accurately estimated.
- c. 1mM indicates these chemicals tested as part of the initial screening assay development were tested at the single concentration of 1mM rather than 200  $\mu$ M as for the TCp1v2 chemicals. These did not produce significant inhibition and were not tested in concentration-response mode.
